# Supplementary material
Source: Springer Nature journal article supplement (http://www.springermedizin.de/resource/supplementary/12968_2012_2650_MOESM5_ESM.pdf/9582414)

## A Infarct Segments

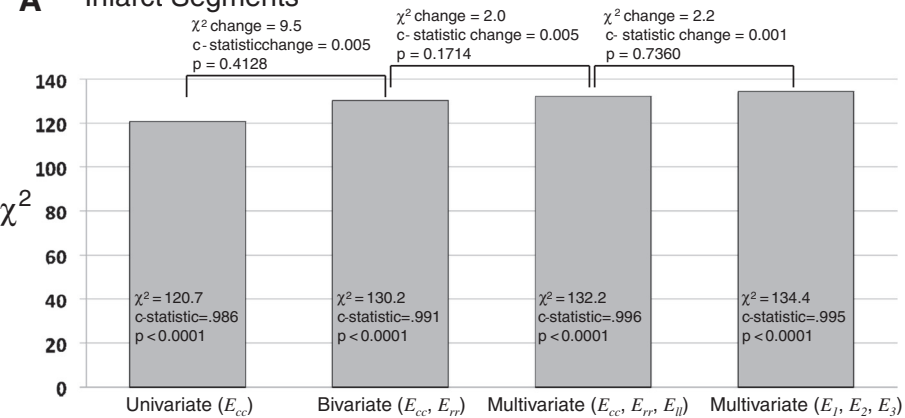

## B Adjacent Segments

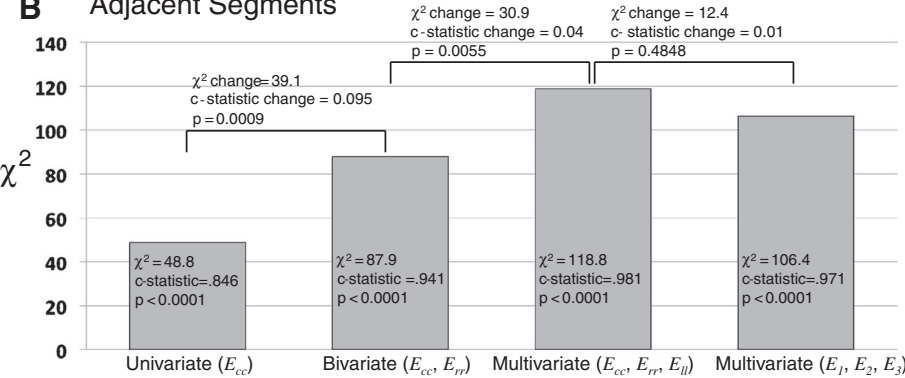

Supplement: MOESM5 [file 9582414]
